# Supplementary material for: Higher Collagen VI Formation Is Associated With All-Cause Mortality in Patients With Type 2 Diabetes and Microalbuminuria
Source: Oxford University Press journal article supplement (doi:10.2337/dc17-2392), 2018-04-11
Supplement: dc172392supplementarydata.pdf [file dc172392supplementarydata.pdf]

## SUPPLEMENTARY DATA

**Supplementary Figure S1. Distribution and correlations.** The distribution of (A) S-Pro-C6 (n=198) and (B) U-Pro-C6 (n=190) of the patients were plotted. Both distributions were positively skewed and were tested for Gaussian distribution by a D'Agostino & Pearson normality test. (A) S-Pro-C6 had a non-Gaussian distribution ( $K2=86.1$ ,  $p<0.0001$ ), and log-transformed data showed borderline Gaussian distribution ( $K2=6.0$ ,  $p=0.05$ ). (B) U-Pro-C6 had a non-Gaussian distribution for both non-transformed ( $K2=251.0$ ,  $p<0.0001$ ) and log-transformed data ( $K2=70.9$ ,  $p<0.0001$ ). (C) Due to the non-Gaussian distribution, a nonparametric Spearman's rank correlation analysis between S-Pro-C6 and U-Pro-C6 was performed. There was no correlation between S-Pro-C6 and U-Pro-C6 (Spearman's  $r=0.03$ ,  $p=0.70$ ). Nonparametric Spearman's rank correlation analysis between S-Pro-C6 and (D) plasma creatinine (Spearman's  $r=0.45$ ,  $p<0.0001$ ) and (E) UAER (Spearman's  $r=0.00$ ,  $p=0.96$ ) at baseline.

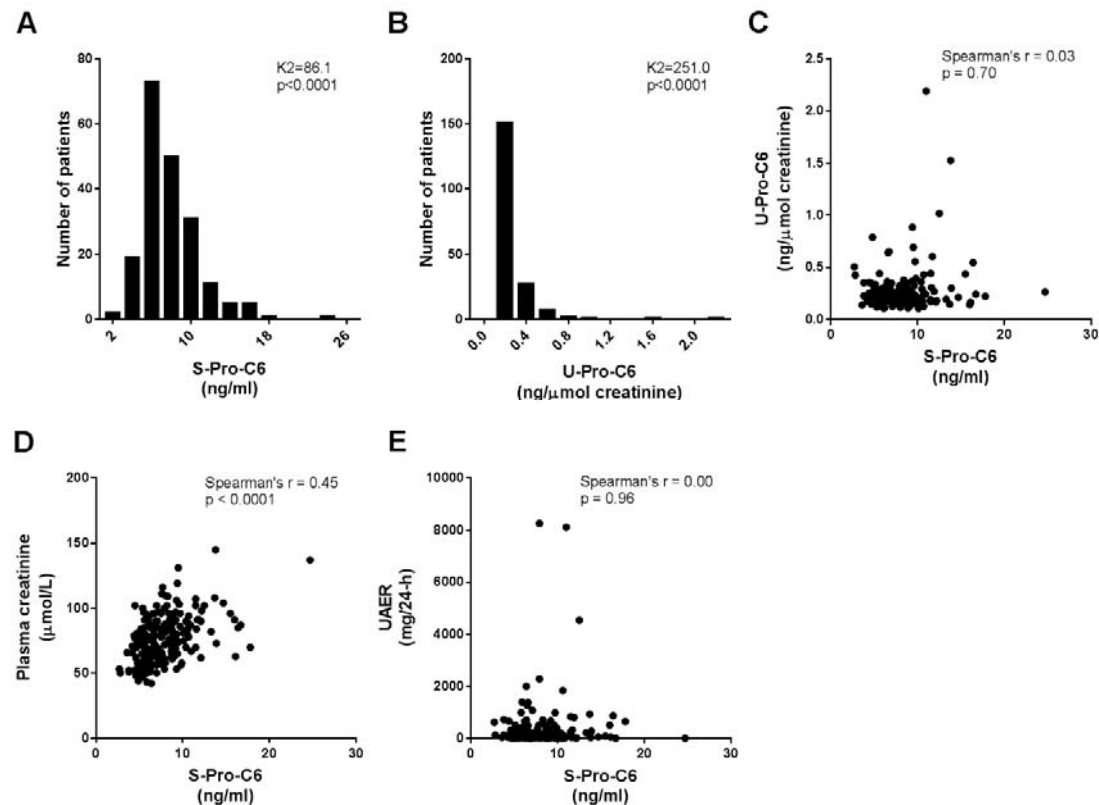

SUPPLEMENTARY DATA

**Supplementary Table S1.** Hazard ratios of S-Pro-C6 and conventional risk factors in the fully adjusted models

| Variables                   | Cardiovascular events<br>(n=38) |             | Mortality (n=26)  |                   | Disease progression <sup>‡</sup><br>(n=42) |               |
|-----------------------------|---------------------------------|-------------|-------------------|-------------------|--------------------------------------------|---------------|
|                             | HR(95%<br>CI)                   | p-value     | HR(95%<br>CI)     | p-value           | HR (95%<br>CI)                             | p-value       |
| S-Pro-C6*                   | 3.06 (1.31-7.14)                | <b>0.01</b> | 6.91 (2.96-16.11) | <b>&lt;0.0001</b> | 4.81 (1.92-12.01)                          | <b>0.0008</b> |
| Age (years)                 | 1.08 (1.01-1.15)                | <b>0.02</b> | 1.04 (0.98-1.11)  | 0.21              | 1.01 (0.96-1.05)                           | 0.81          |
| Sex=male                    | 3.09 (0.93-10.26)               | 0.06        | 2.90 (0.83-10.17) | 0.10              | 0.87 (0.36-2.12)                           | 0.76          |
| BMI (kg/m <sup>2</sup> )    | 0.95 (0.88-1.02)                | 0.13        | 1.00 (0.93-1.08)  | 0.92              | 0.91 (0.85-0.98)                           | <b>0.01</b>   |
| Systolic BP (mmHg)          | 1.01 (0.99-1.03)                | 0.21        | 0.99 (0.97-1.02)  | 0.56              | 1.01 (0.99-1.03)                           | 0.35          |
| Smoking=yes                 | 1.56 (0.77-3.14)                | 0.22        | 2.89 (1.25-6.66)  | <b>0.01</b>       | 0.67 (0.30-1.50)                           | 0.33          |
| HbA <sub>1C</sub> (%)       | 1.15 (0.86-1.56)                | 0.35        | 0.82 (0.58-1.16)  | 0.26              | 1.12 (0.87-1.44)                           | 0.38          |
| LDL-cholesterol (mmol/L)    | 1.44 (0.96-2.16)                | 0.08        | 1.28 (0.77-2.11)  | 0.34              | 0.76 (0.48-1.22)                           | 0.25          |
| Plasma creatinine (μmol/L)  | 1.0 (0.97-1.02)                 | 0.82        | 0.97 (0.94-1.00)  | <b>0.04</b>       | 1.00 (0.98-1.03)                           | 0.87          |
| UAER (mg/24-h) <sup>†</sup> | 1.30 (0.74-2.28)                | 0.36        | 1.17 (0.59-2.33)  | 0.65              | 2.11 (1.23-3.62)                           | <b>0.007</b>  |

Hazard ratios (HR) with 95% CI are listed. \*S-Pro-C6 hazard ratios are listed as per doubling. <sup>†</sup>UAER was log<sub>10</sub>-transformed prior to analysis. Cardiovascular events was defined as a composite of cardiovascular mortality, stroke, ischaemic cardiovascular disease and heart failure. <sup>‡</sup>Data on disease progression was only available for 175 out of 198 patients (88.4%). Disease progression was defined as a decline of eGFR of more than 30%. BMI, body mass index; UAER, urinary albumin excretion ratio.
